# Supplementary figures and images for: ISA-TAB-Nano: A Specification for Sharing Nanomaterial Research Data in Spreadsheet-based Format
Source: Springer Nature journal article supplement (doi:10.1186/1472-6750-13-2), 2013-01-14

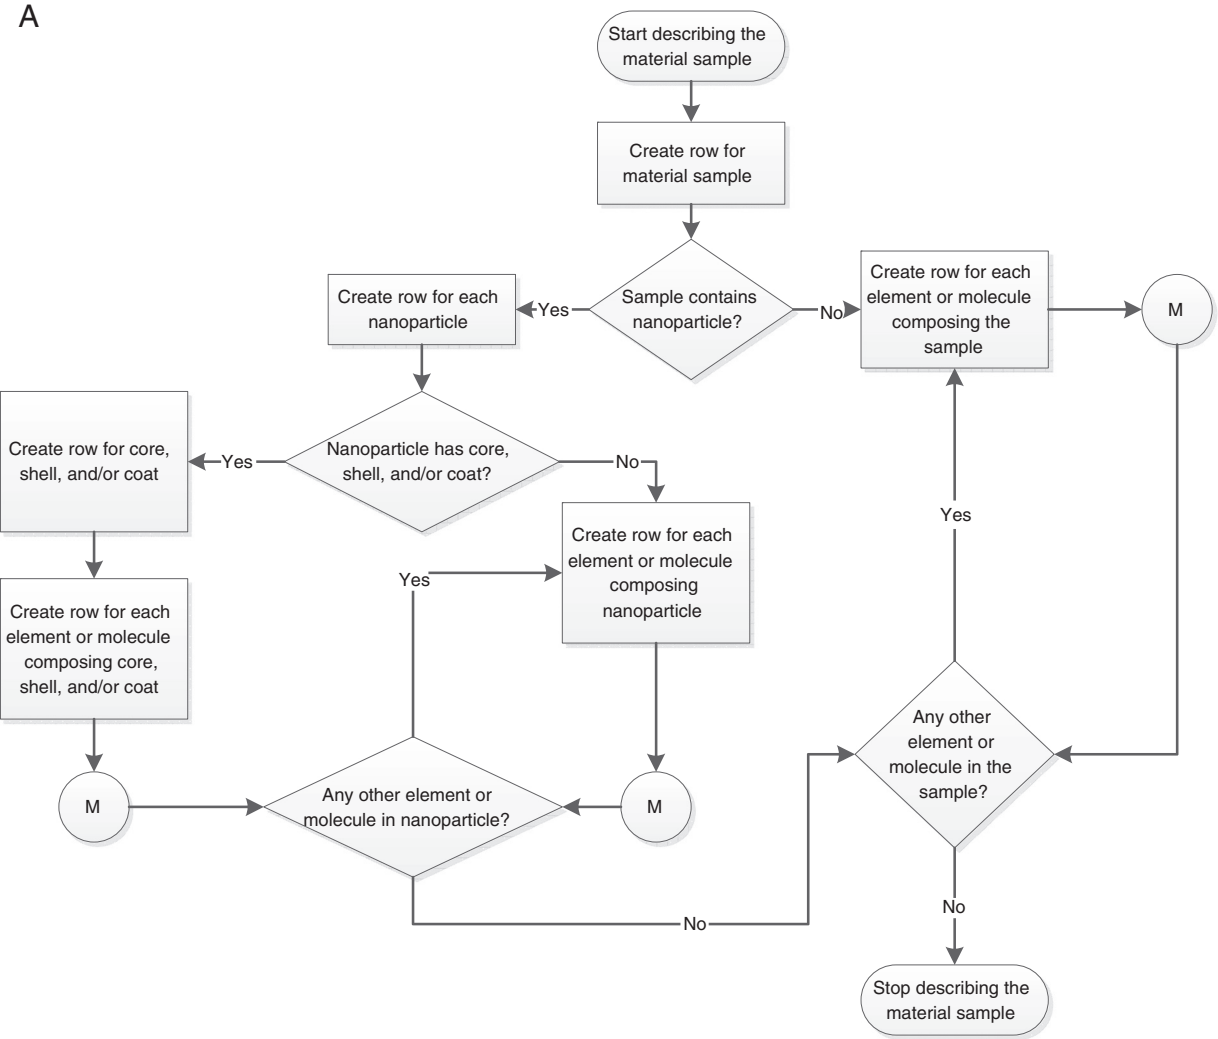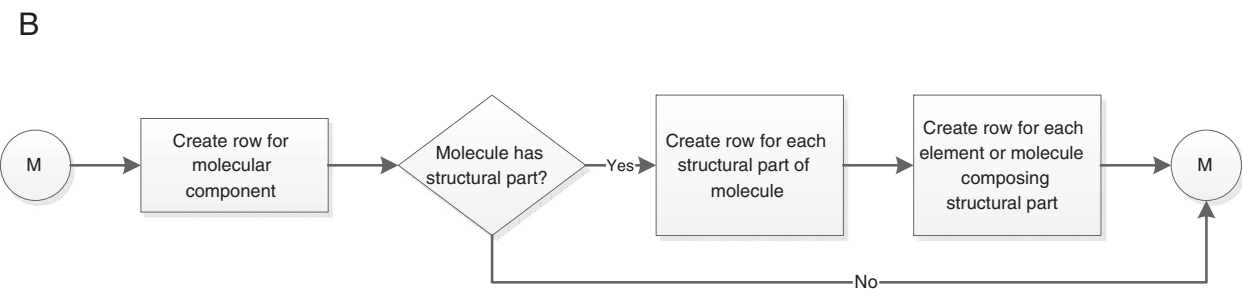

Supplement: 12896_2012_794_MOESM4_ESM.pdf [file 12896_2012_794_MOESM4_ESM.pdf]
